# Supplementary material
Source: Research Square preprint supplement (doi:10.21203/rs.3.rs-9575819/v1)
Supplement: Supplementary file 1 [file 9a0f1afc5e6dd722d0d76a9e.docx]

**Sequence information of 12 candidate reference genes screened from the *Rubia cordifolia* L.transcriptome database**

1. Actin7 (*ACT7*)

GAGGGGATCCGAGGCCTACGACCCCTGTCGTGCTGTTCTTCGAGGACCCTTATTCCGTAGCCAAGCCAGCCTAGCCTGCCGTCTTTTTGCTTCTTAATTTCCCAGATCTATGGCACCCCTTTTAATAATTTGAGCATCCGGGCTTTGGAGGGTTGGTAAAACAAGAACCGTGGATTAACTATAATTTGGCAAGATCTTATTGTAGTTGGTGTGTTGGAGTAAGATCTCTAAGAGATGGCAGAGTCTGAGGATATTCAGCCCCTCGTGTGCGACAATGGGACCGGAATGGTTAAGGCTGGTTTTGCTGGTGATGATGCTCCCAGGGCTGTGTTCCCAAGTATTGTAGGTCGTCCCCGGCACACTGGTGTTATGGTTGGAATGGGCCAAAAGGATGCTTATGTGGGTGATGAAGCACAATCAAAGAGAGGTATCCTGACCTTGAAATACCCCATAGAGCATGGTATTGTGAGCAACTGGGATGATATGGAAAAGATATGGCATCACACTTTCTACAATGAACTTCGTGTTGCTCCTGAGGAGCACCCCGTGCTTCTCACTGAGGCGCCTCTTAATCCAAAGGCTAACAGGGAGAAGATGACTCAGATCATGTTTGAGACATTCAATGTTCCTGCCATGTATGTTGCCATTCAAGCTGTTCTGTCTCTGTATGCCAGTGGTCGTACAACTGGTATTGTGCTGGATTCTGGCGATGGTGTGAGTCACACTGTACCAATCTACGAAGGGTATGCTCTTCCCCATGCCATCCTTCGTCTTGATCTTGCTGGTCGTGATCTTACTGATCACCTCATGAAAATTCTCACTGAGAGAGGGTACATGTTCACCACATCAGCAGAACGGGAAATTGTCCGTGATATTAAAGAAAAGCTTGCGTATGTTGCTCTTGACTTTGAGCAAGAGCTTGAGACAGCAAAGAGCAGCTCATCTCTGGAAAAGAACTATGAATTGCCTGATGGGCAAGTTATTACGATTGGAAATGAGAGATTCCGTTGCCCTGAGGTTCTTTTCCAGCCTTCTATCATTGGAATGGAAGCTGCTGGAATCCACGAGACAACTTACAATTCCATCATGAAGTGTGACGTGGATATCAGGAAGGATCTCTATGGTAACATTGTTCTCAGTGGTGGTTCGACCATGTTCCCTGGTATTGCTGACCGTATGAGCAAGGAAATCACAGCCTTGGCTCCCAGCAGCATGAAGATCAAGGTGGTTGCACCTCCAGAGAGGAAGTACAGTGTCTGGATTGGAGGGTCAATCCTTGCATCCCTCAGCACCTTCCAGCAGATGTGGATTTCCAAGGCTGAATATGAGGAATCTGGTCCATCAATTGTTCACAGGAAGTGCTTCTAAGCTGTTAGATTGCTTTGAATGTTTGCATTTTTGTCTGTGCAGATGGATGCTGAGATGCCGTTGGCCTTCCTCCCCATCTCCTCCCCTCCTCGTGGCTTGAACAATGTCATTTTTAGTAGGTTGCTTGTAGCTGAAAGAGTGATTGTGATGTCATTTTTACCTTTGTTTTTTTGGTGTCCCATTTCCCCCATGTTTTAGTATTTGGATTTTTTTTCTACCTGGGAACAGTTATGTTAATATTGATTTTGCATGGAGAATATTGTATTCACCTTAGTGTCAAGTTTGAGGGAATTATATCTATAATATGCTGCAGTGCTTGAATCCTT

1. Tubulin (*TUB8*)

GAGGGGATCCACACACACTCTCACACACGAGCGCCCTCTGCTCATCTTTTCTCTCTCTCCGCTAGAACAAAAAATCAGGAAAAATGCGTGAAATTCTGCACATTCAGGGTGGCCAGTGCGGGAACCAGATCGGAGCTAAGTTCTGGGAGGTGGTTTGCGCCGAGCACGGCATCGATTCCACAGGAAGGTACAAAGGTGACAACGACTTACAGTTGGAGCGCGTGAATGTCTACTACAACGAGGCTAGCTGCGGGCGGTTCGTCCCACGCGCCGTCCTCATGGACCTGGAGCCTGGTACCATGGACAGCGTCAGATCTGGACCGTACGGCCAGATTTTCCGGCCGGATAACTTCGTTTTCGGACAGTCCGGCGCCGGAAATAACTGGGCGAAAGGTCACTACACTGAAGGCGCTGAACTCATCGACTCCGTACTGGATGTTGTGAGGAAGGAGGCCGAGAATTGTGATTGTCTTCAAGGTTTTCAGGTTTGCCACTCGTTGGGTGGTGGAACTGGTTCTGGAATGGGAACACTTCTGATTTCTAAGATTAGGGAGGAGTATCCTGACAGGATGATGCTTACATTCTCTGTGTTTCCATCGCCTAAGGTGTCTGATACAGTTGTCGAGCCCTACAATGCTACCTTGTCTGTTCACCAGCTAGTTGAGAATGCTGATGAGTGCATGGTTCTGGATAATGAAGCCCTTTATGATATTTGCTTCCGGACTCTTAAGCTCACCACCCCGAGTTTTGGGGACTTGAATCACTTGATTTCTGCTACAATGAGTGGTGTTACCTGCTGCCTTCGCTTCCCCGGTCAACTGAACTCAGATCTACGAAAGTTAGCTGTCAATCTGATTCCATTCCCCAGGTTGCACTTCTTCATGGTTGGGTTTGCTCCGCTCACATCTCGTGGATCACAGCAGTACAGAGCCCTCACAGTGCCAGAGCTAACCCAGCAGATGTGGGATGCCAAGAATATGATGTGTGCTGCTGATCCTCGCCATGGACGTTATTTGACTGCTTCAGCAATGTTCAGAGGAAAGATGAGCACCAAGGAAGTTGACGAGCAGATGATTAATGTCCAGAACAAGAACTCATCTTACTTTGTTGAGTGGATTCCAAACAATGTGAAGTCTACAGTATGTGACATTCCTCCCACTGGTCTGAAGATGGCTTCAACTTTCATCGGCAATTCCACTTCAATCCAGGAAATGTTCAGAAGAGTGAGTGAGCAATTCACAGCTATGTTCCGCAGGAAGGCTTTCTTGCATTGGTACACTGGAGAAGGCATGGACGAAATGGAGTTCACAGAGGCCGAAAGCAACATGAACGACCTGGTTTCTGAGTACCAGCAATACCAAGATGCAACTGCAGAGGAGGATGGCTATGATTATGAAGATGAAGAGGAAGAGGCTCAGGAAAATTAAGTATTAATCCTAGTATATTCCGTTGAGCTTTTAGTGTGTTTATGTTGGAAGTTTCTTCTGGTTTTCTGATTTCCGCGGCTCTTGCCACTGTTGTGGAAAGGCCGTTTGTTTGTCTTGCTGTGTTTTGGTAGTATTAGCATTGGGTATATTGTTTCTCGCAATCTTGTCTTTCTCGGGATCTTTGGGATCTTGAGTTCGTAATGTTGGTTAGTATTAATGTCAGTGATTCGTTTGATCTACGGTTTTATGTTAAGCTGTGGTTGCTTTGAAAATGTGAGTTCTGATTGCTGGTTGCCAGCGCTTGGTGCGCTGAGTGCCTTGTCAGGTTGCGTTATCGTGGGTGTTGAGGTTGGTAATGCGGTCTGTTGCAGACGGTCACATGATCCGATGGTTGTTTATTTAGAATGATTGAGTCAGCATGATAACACAGATACTAGAATAATGCTTTGGGATC

1. Ubiquitin (*UBQ*)

GAGGGGAGGAATGCAGATTTTCGTCAAGACACTGACTGGAAAGACCATCACCCTGGAGGTCGAGAGCAGCGACACCATTGACAATGTTAAGTCGAAGATCCAGGACAAGGAAGGCATTCCCCCGGACCAGCAGAGGCTGATCTTTGCTGGAAAGCAGTTGGAAGATGGCCGTACCTTGGCTGACTACAACATTCAGAAGGAATCAACTCTCCACTTGGTGCTCCGATTGAGGGGTGGTATGCAGATCTTTGTCAAGACTTTGACAGGAAAGACCATCACCCTTGAGGTGGAGAGCAGCGACACGATCGACAACGTCAAGGCCAAGATCCAGGACAAGGAAGGTATCCCTCCGGACCAGCAGAGGCTTATCTTCGCTGGTAAGCAGCTGGAGGATGGCCGCACCCTTGCTGATTACAACATCCAGAAGGAGTCCACCCTCCATTCGGTCCTCCGTTTGAGGGGAGGCATGCAGATCTTTGTCAAGACCTTGACCGGCAAGACCATCACCTTGGAGGTTGAGAGCAGCGACACCATTGACAATGTCAAGACCAAGATCCAGGACAAGGAGGGTATTCCCCCGGACCAGCAGAGGCTGATCTTCGCTGGAAAGCAGCTTGAAGATGGCCGCACTCTTGCAGACTACAACATTCAGAAGGAGTCCACTCTTCACCTGGTGCTTAGGTTGAGGGGAGGAATGCAGATTTTCGTCAAGACACTGACTGGAAAGACCATCACCCTGGAGGTCGAGAGCAGCGACACCATTGACAATGTTAAGTCGAAGATCCAGGACAAGGAGGGTATTCCCCCGGACCAGCAGAGGCTGATCTTCGCTGGAAAGCAGCTTGAAGATGGCCGCACTCTTGCAGACTACAACATTCAGAAGGAGTCCACTCTTCACCTGGTGCTTAGGTTGAGGGGAGGAATGCAGATTTTCGTCAAGACACTGACTGGAAAGACCATCACCCTGGAGGTCGAGAGCAGCGACACCATTGACAATGTTAAGTCGAAGATCCAGGACAAGGAGGGGATCCCACCGGACCAGCAGAGGCTGATCTTCGCTGGCAAGCAGCTTGAAGATGGCCGTACTCTCGCGGACTACAACATCCAGAAGGAGTCCACCCTTCACCTTGTCCTCCGTCTCCGTGGTGGTCTCTGAGTGTCGCTGTGGTTGCTTTGTCTGAAGTTGGAACAATTTAAGTGTTTTTTTGTTTGATGGGATTTGGCGGTGGTGTTTTTATGTTTTAAGCTTTTGTGTATGGGATCCATGGTGGTGTTGAAACAATATCAGTGATAAATAAAGTTTCTTTCTTTGTTCTAC

1. Histone superfamily protein (*HIS3.3*)

GAGGGGTTACTTCGTCGTTGAAGAGAGATGGCTCGTACTAAGCAAACCGCTCGCAAGTCAACTGGAGGAAAGGCTCCAAGGAAGCAGCTTGCCACTAAGGCTGCTCGTAAGTCTGCTCCCACCACTGGTGGCGTGAAGAAGCCCCACAGATACCGTCCTGGAACTGTTGCTCTACGTGAAATCCGTAAGTACCAGAAGAGTACGGAGCTCTTGATCAGGAAGCTTCCATTCCAGAGGCTTGTACGTGAAATTGCCCAGGACTTCAAGACTGATCTGCGTTTCCAGAGCCATGCTGTACTTGCTCTGCAAGAGGCTGCTGAGGCTTACCTTGTTGGGCTGTTTGAAGACACCAACCTGTGTGCCATCCATGCCAAGCGTGTGACCATCATGCCTAAGGATATTCAGCTGGCTAGGAGGATCAGGGGTGAACGTGCTTAAGTAACTCTTGCTAATAGGAGGACAAATGCAAGTGTAGAACTAGTTATTTTGGTGGTGTCTTCCGTTGGTTTACCAAGCTATATATAGTTGAAAGTGCTCTGCTTTTGCTTGGTAGTAGTTGGTGTTGGGCATTATTAGTGGCACACAGGTGATTTGAATCTCTTGCGAAAACCTGGTTTGTGGATTTTTTAAACCTTTGATGTACAAGGAAACTTGCAAAACTCTTTTAAGGTCCAACTCTTGGGGATATTTTATTCTGACTTGCGCTCTAACAAGTCTCGTGATTAGATGATTACCAGGTTTATTGGTGGGAAGGTTTAATATAGCAACAATGAAATAGTTTGTAAGCAAACTCAAACTTGCTCTCTAAATTAGATCAAAGGTTTATTGATATGTACAATAAAATATCTTTCAGGTAAATAGCATGGATTCATTACATTTTATATTTGATTAATAAAGAATTGTACAAATCTCGAG

1. eukaryotic translation initiation factor 3 subunit D-like, partial (*elF*)

GGGGGATTGGATCCGCCGCGATTGGGGTTGAGAGTGCACGGGTCCAGTCGGCGATCTTACCGAGCTTGTCCGAACCACCCTTCCAACGTCCCGTTCGCTCCCTTCTCCCGGTCGGACAAGCTCGGTAAGATCGCCGACTGGACCCGTGCACTCTCAAACCCCAATCGCGGCGGATCCAATCACCCCAACAACAAGAACGCCACCGTCGACTCTGCCTTCGACTTCTCCGGTGACGACTCCTTCGCCACTCTCGCCGCCGACGAGGACTCCTCGTTCCGCCTGGTGGATAATGCTGCGTCCAAGTCCCACCACAGCAACCCCAATCGCCCAAAGTTCAATCCGCGGTGGCGGTTCAACCCGCACCACAACCGCTCTCAGCTCCCGCAGCGGCGCGACGAGGAGGTGGAGGCGAAGAAGCGCGAGGCCGAGAAGGAGCGCGCGCGTCGCGACCGCCTCTACAACCTCAACCGCTCGACGACGAACTCCGGGCCTCGCCGCGAGTCCTCCGTCTTCAAATCCTCTGTTGATATCCAGCCCGAGTGGAATATGCTCGACCAGATCCCGTTCTCCACATTCTCGAAGCTCTCCTTCTCTGTCCCGGAGCCTGAAGACCTTCTCATCTGTGGCGGGCTCGAGTTCTACGACCGCGCCTACGACCGAGTCACTCCCAGGAATGAACGCCGTTTGGAGAGGTTCAAGAACCGTAACTTCTTTAAGATAACCACTACAGACGACCCCGTGATTCGCCGACTTGCCAATGAGGATAAGGCCACGGTTTTTGCGACGGACACCATTCTGTCAACGCTTATGTGCGCTCCGAGGTCAGTTTACTCGTGGGACATCGTGATCCAGCGCGTTGGAAACAAGCTCTTCTTTGACAAGCGTGATGGGTCTCAGCTAGATTTGTTATCTGTCCACGAAACCTCTCAAGAGCCCTTGCCTGATGTCAAGGATGATATAAACTCTGCGTACTCTCTTAGTGTCGAGGCTGCGTATGTGAACCAGAACTTCTCGCAGCAGGTTCTGCATAGGGATGGTAACAAGGTGAGTTTTGAGGAGCCTAATCCTTTTGCGCCTGAAGGAGAAGAAGTGGCTTCTGTGGCTTATAGGTACAGGAGGTGGAAGCTTGATGATGATATGTATCTGGTTGCACGGTGTGAGGTGCAGAGTGTTGTGGATTTGAATAACCAGAGGTCGTTTTTGACTCTGAATGCATTGAATGAGTTTGATCCCAAGTATTCTGGTGTGGATTGGAGGCAGAAGCTGGAGACTCAGCGTGGTGCTGTGCTGGCTACCGAGCTGAAAAACAATGCAAACAAGTTGGCAAAATGGACTGCACAGTCGCTGTTGGCTAGTGCTGATATGATGAAGCTGGGTTATGTTTCAAGAGTGCATCCTAGGGATCACTATAACCATGTCATTCTCGCTGTTGTTGGTTACAAGCCAAGGGATTTTGCTGGGCAGATTAATTTGAACACTTCTAATATGTGGGGTATTGTGAAGAGTATTGTGGACCTGTGTATGAAGTTGAACGAGGGCAAGTATGTTCTTGTTAAGGACCCCACGAAGCCGCAAGTGAGGATCTACGAGGTTCCGCCTGATGCGTTTGAGAACGATTATGTGGAGGAGCCTTTGCCAGAGGATGAACAGGTTCAACCACCTGCTGAGGATGCTGAAGCTGTGGATGGTATCGCAGAAGCGAACAATGTGGAGGACAAAGAGCCTGTTACTGAAACTGTAGCAGCAGCATGAGTGTGATCTTTGAGGTGGTTTAGATGGCCATAGTAAATTAGCATGCTATAATTCCAGAACTCGACAGTGGTGTTTTCTCCAGGGATGCAAGGAAAATAACCAACTAATTGTGGAGCTCTTTCTTGGCCTTGGCACAGTAATTGTAGTAGTGCCTGGAGGAAGTTTTGTTAAGCTGAAAAGGATTTGATAAATTATGCAGCAATTATAAAGAGTACTCTGTGAACTATTCTCCCCCCTACCCACGTTCTGGCGATGTTTTATGCTTCCTTATTTACCATACATAATATTGCTGCC

1. TATA binding protein (*TBP*)

GAGGGGGATTCATCTTCATCCTCTCTCAAAACTCCTTCCTTCTCTCTCTATATATATCTT

CATCCCCATATATATACTTCTCCCAAAATCCACACATTTATAAAGCTCTTGATTTCAAAA

TTTCGCCGCTTTTTTCCATCTTCTCTCAATCCATCGGATCCATTTCGCCTCCCTGTTGTT

TATCTCTCCGATAAATCCCCTTCTTTGCTATTCCGAAACCCTAGTTTCGGTTTCAAGAAA

TTTAGAATGGCGGATCCTCAAGGATTGGAAGGGAGCCAGCCAGTAGATCTCTCTAAGCATCCTTCTGGAATTGTTCCCACTCTGCAGAACATAGTGTCGACTGTTAACCTAGACTGCAAATTGGACCTGAAGTCCATTGCTTTGCAAGCTAGAAATGCAGAATATAATCCAAAGCGTTTTGCTGCTGTCATTATGAGAATTAGAGAGCCAAAAACTACGGCCTTAATTTTTGCCTCTGGAAAGATGGTTTGTACCGGAGCCAAGAGTGAGCAGCAGTCTAAATTGGCAGCTCGGAAGTATGCTAGAATCATCCAGAAGCTTAATTTTCCTGCCAAATTCAAGGATTTTAAAATACAGAACATTGTGGGTTCTTGTGATGTTAAATTCCCCATTAGATTGGAAGGGCTTGCTTACTCTCACGGAGCCTTTTCAAGCTATGAACCTGAACTCTTTCCTGGATTGATATATCGAATGAAACAACCGAAAATTGTACTGCTTATCTTCGTTTCTGGAAAAATTGTCCTTACTGGAGCAAAGGTTAGGGAGGAGACCTATGCTGCATTTGAGCTTATATACCCTGTTCTGACTGAGTTCAGGAAGAATCAGCAATGATTGAGAGAGAAAGATTGACCAACTTTGTGGATGACAGAACCGGTCTTCATGTCTATGTGGGACGGCGGTGTATATTAGAGAGGGACTGGACTGGCAAGTCTGGCATGGCTATTGTTTGGGTTCTTTTAGATAATATAATGGAAGCAGCTGGTTCTACGGTGGAAAAATTAGTAGGGGCAACTAAAATTTTGTTTCTTGCTATGCTTTTAAGTTAGGCTTTCGATGGACCCCGAATTTGCTGGTCTTGTCTTGAATGTAATCTGAACGGAAACATGTGCTTAATCTGAATTTTACATTCTC

1. serine/threonine-protein phosphatase 2A activator isoform X2 (*PP2A*)

GGGGGGATGGTGGTTTTAATTTAATCAAAAAAAAAAAAGTGTGAGAACCCTTTTTAATAAGTACCGGAGGCGGGTAATGCTTGTATTCATTTTCCCAACAAGGACTAGATGGAAGATACTCCTACTAACAAAGAGCCACCGCCGCCCGCCGCCCCCCACCACCATGACCACCACACCGCCTCCACCACCTGTTTGAAGTGCGGCGGCCCGACCGCTTTCCCGGACCCACCGCCTGCATCCTCCAACCTCACCTACATCCCCATCCGCTTCCCCGCCGTGAATCTCCCCGCCAACCCAACCAACACCAAAGAAGCCATCATCCGTACCCCGGTCCCACAGGCGCAGCGCGTGGCCCCACTCGACCCTCCATACAATTTCCACGCGCCGGTGAAAGTCATCTCCTCCCAAAACGACGTCGCTCGGCTCCACGCCTCCCCTACTCTCGCCAACTTCCTCGGCTTCGTTGTTTCCCTATCGGAGTCCATCAAATCTCGCAAGCTCTCCGATCCCTGCCACGTGTCCCCAACGACATCGAACCTCGTCGCCGTGATCGAGAGGCTGGCCTCTTTCGCCGATGAAATCCCGCCGGCGCCGCAGTCCGCGCGTTACGGCAACGTCGCGTACCGCGAGTGGCACGAGAGGATGACCGCCGAGGCGGAGTCGTTCATGCTTATGCTGCTCCCTCCGAATCTCCACGAGGCGGCGGTGGAATTGGTGCCCTATTTCACTGACAGTTTCGGCAATGCTAGCCGAATCGACTACGGTACGGGACATGAAACAAATTTTGCAGCGTGGCTATATTGCTTAGCTAGATTGCAGATTGTGAAAGAAGAGGATTATCCAGCCTTGGTGTCAAGGGTATTCACAAAGTACTTGGATTTGATGCGAAAATTGCAGCTTACATATTCCTTAGAGCCAGCTGGATCTCACGGAGTTTGGGGACTTGACGATTACCACTTTTTACCTTTCATCTTTGGTTCTTCGCAGTTGATTGACCACAAGTATATGAAGCCAAAGTCGATTCATAATGAGGATATATTGGAGAATTTTGCAAGCGAGTATCTGTATCTCTCTTGTATTGTATTTATAAAGAAGGTTAAAAAGGGACTCTTTGCAGAGCATTCTCCAATGTTGGATGATATCAGTGGTGTGCCAAATTGGAACAAGGTCTATAGCGGGCTCTTGAAGATGTACAAAGTGGAAGTTTTGCAGAAGGTCCCTATCATGCAACATTTCCTATTTGGTTCGATAATCAAATGGGATTGATCTGAGATGCTCTTCATTGCACAGTGAGGAGGTTCTGGAGTCGCAGCTTTATAGATCTATGATTTTGTCTCTATTTAGTTGTAATACATGCAGTGACATTAATTAGTTAGTGAAAAATCGATGACAATTTTATCAGTTTCATCGCACGTGTTGGCTTGATGTT

1. elongation factor 1-alpha (*EF-1α*)

GGGGGAGTCACTCTCTCCCCAAGTTCCTCCTCATCCAAAGAACTAATCTCCGAGAGAGAGTTCTCTTATCGCCTCCCTCTGCTAAGTGTTTTTAGTGAGCTATCATCATGGGTAAAGAGAAGTTTCACATCAACATCGTGGTCATTGGACATGTCGACTCTGGCAAGTCCACCACTACTGGTCACTTGATCTATAAGTTGGGAGGAATTGACAAGCGTGTCATTGAGAGATTTGAGAAGGAAGCTGCTGAGATGAACAAGAGGTCATTCAAGTATGCCTGGGTTCTTGACAAGCTCAAGGCTGAACGTGAGCGTGGTATTACCATTGATATTGCTTTGTGGAAGTTTGAGACCACCAAGTACTACTGCACAGTCATTGATGCCCCTGGACATCGTGATTTCATCAAGAACATGATCACGGGTACCTCACAGGCTGACTGTGCTGTTCTCATCATTGACTCCACTACTGGAGGTTTTGAGGCTGGCATTTCCAAGGATGGACAGACCAGGGAGCATGCTCTTCTTGCTTTCACACTTGGTGTCAAGCAGATGATCTGTTGTTGTAACAAGATGGATGCCACCACCCCGAAGTACTCCAAGGCTAGGTATGATGAAATCGTGAAGGAAGTTTCCTCCTACCTCAAGAAGGTTGGTTACAACCCAGACAAGATCAACTTCGTCCCCATCTCTGGGTTTGAAGGTGACAACATGATTGAGAGGTCCACCAACCTCGACTGGTACAAGGGACCAACCCTTCTAGAGGCCCTTGACATGATCAACGAGCCCAAGAGACCCTCAGACAAGCCACTCCGTCTTCCCCTCCAGGATGTGTACAAGATTGGTGGTATTGGAACTGTGCCAGTGGGTCGTGTTGAGACTGGTATCATCAAGCCTGGTATGGTAGTCACATTTGGCCCAACTGGGTTAACAACTGAGGTCAAGTCTGTGGAGATGCACCACGAGGCACTCCAGGAGGCTCTTCCTGGTGACAATGTTGGGTTCAATGTTAAGAATGTTGCTGTCAAGGATCTCAAGCGTGGATATGTTGCTTCCAACTCCAAGGATGACCCTGCAAAGGGTGCTGCCAGCTTTACCTCTCAGGTCATCATCATGAACCACCCTGGACAGATTGGAAACGGTTATGCCCCAGTCCTAGATTGCCACACCTCTCACATTGCTGTGAAGTTTGCTGAGCTCTTGACCAAGATTGACCGGCGATCTGGTAAGGAGATTGAGAAGGAGCCCAAGTTCTTGAAGAATGGTGATGCTGGTATGGTTAAGATGCTTCCCACAAAGCCCATGGTTGTGGAGACCTTCTCAGAGTACCCTCCCCTTGGACGTTTTGCTGTGAGGGACATGCGTCAGACCGTTGCTGTTGGTGTCATCAAGAGCGTTGACAAGAAGGACCCTACTGGAGCAAAGGTGACCAAGGCAGCAGCCAAGAAGGGAGCCAAGTGAAATGTTTCCATTGCTATCTTTCTAAGACTAGTTTCTGTTATTTTCCGTTTCTGTTATGATGAACATCCTAGAATTTTTGGGTATTTGGACTCTGTGGATTCCATCAAGGTTCTCCAGCCTCACTTGTGAGGATAGTGGTGAAATCAAGCAAACATGGTGTGAGCCTGGTTTTGCTTGATGGCATTGGTGGAATTCATTTTATTTTTCTGTTTCTGTTTTCTATTAGCAGGATGGAACATATGAGTTTTGTGGTCAGTCAATTAAGAGTTATGGAGTTATGTTTTCGCTAATTGCTGCTAAGTACGTATACATCTGCATGTGTTTCTGGCTGATGTAGCTTGTTTGTCCAATCCCTGTCTTATGCGTCAGCTTAATGAGGTTCATCATCGTCTTCTC

1. 60S ribosomal protein L5 (*RPL5*)

GAGGGGAGATTACGATAGCCCTCGCAGTCGCGGCGATTGCCACATTTTCGGGACAGAGGGCATTTCTGCTTGTGAGATCATGGTGTTCGTGAAATCCCAGAAGTCAAGGTCCTACTTCAAGAGGTACCAGGTCAAATTCAAGAGAAGGAGAGAGGGAAAGACTGACTATCGTGCTAGGGTCCGATTGATTAATCAGGACAAGAACAAGTATAATACGCCTAAGTACCGGTTTGTTGTGAGGTTCACCAACAAGGACATTGTTGCACAGGTTGTCTCTGCTAGCATCACTGGTGACCATGTTCTTGCTGCTGCTTATGCGCATGAGTTGCCCCATTATGGTCTTAAACTTGGCCTAACTAACTATGCTGCTGCCTACTGCACTGGTCTGTTACTTGCCCGCCGTGTTCTCAAGAAGCTGGAAATGGATGCTGAGTATGAAGGGAATGTTGAGGCTACTGGTGAGGATTATTCTGTTGAACCATCTGAAAGCAGAAGGCCTTTCCGTGCTCTCTTGGATGTGGGCCTTATCAAAACCACTACCGGCAACAGAGTTTTTGGTGCACTGAAGGGTGCATTGGATGGTGGGCTTGACATTCCTCATAGTGAAAAGAGGTTTGCGGGGTTTGGTAAGGACTCCAAACAGCTTGATGCTGATGTTCACCGCAAGTACATCTATGGGGGCCATGTCTCTGCATATATGAGAACACTGGAAGAAGATGAGCCAGAGCGGTACCAGTCTCACTTTAGCCAGTACCTTAAGAGTGGTGTTACAGCTGATGACATCGAGGCATTGTACAAGAAAGTCCACACAGCTATTCGTGCGGATCCAACTGAAAAGAAATCAGCTAAGAAGCCCGTGACTCAGCATAAAAGGTACAATCTTAAGAAACTGACTTATGAGCAAAGGAGGACCAAGTTGATCGAGAGGTTGAATGCATTGAATTCCGCTGGTGATGATGTGGAGGAAGACAACGACGAGTAAACTTGAATCTGCTTGATCTTTATTCAACATTATTCCAAGATATTAATAGATTTTGAGAATTTTGCATGTTTAGTGGTTGAATATTTTATTTCTGAATTTATATGTTCAGTTTGTCTTTTGGCTTCATAAAGACTGTCTACAACTATAAAAAAATTTTTTGGGAGAG

1. Heterogeneous nuclear ribonucleoprotein (*hnRNP*)

ACGCATTCAGTCAGGTGAGTTGGAGATAGAGAAAGCAATAGCATCTCGGAGGGGGGCGAGCGATCTAGGGTTTTGAGAAGGAGGAGTTGGCGAGAGTGAGCGATTTCATTTTGTTGAGAGTGTGAGAGGCCGGTTTTTGAGCGTTTTGTGCGGTTTCCGGAATCTCATTCCTTCCAAATGTCCGACAGAAAGCTTGTAGTCTTAGGTATCCCGTGGGATGTGGAAACCGAAGGTTTGAGGGAATACATGGCCAAGTTTGGGGATTTGGAGGACTGCGTTGTCATGAAGGAGAGGTCTACTGGACGATCTAGGGGATTCGGATATGTGACTTTTGCGACAGCTGGAGATGCAAAGGCAGCACTGTCAAGTGAGCATACACTTGGTAATAGAATACTGGAAGTCAAAATTGCCACTCCAAAGGAGGAAATGAGGTCATCATCCAAAAAAATCACCAGGATTTTTGTTGCACGGATTCCCCCATCTGTGTCTGAAGCAGCATTCCGAAGTTATTTTGAGAAATACGGGAACATTACCGATCTTTACATGCCCAAGGATCCAAGTACTAAAACACATCGTGGAATTGGGTTCGTCACTTTTGTTAATTCGGAATCTGTGGATGATCTAATGGCCGAGACCCATGAGTTGGGGGGCTCTACAATTGTTGTCGATCGAGCCACTCCCAAGGAGGATGAGATCAGGCCAGTAAGCCGAATGCCTCCAAGTGGTTATGGTGCATATAATTCTTACATGAATTCTGCAACCAGATATGCAGCATTAGGTGCTCCCACCTTATACGACCATCCTGGCTCTATGTATGGAGGAAGAAATGGCCCAGTAGCCCCTCCACGTGGTATGGGCAAAAAGATTTTTGTTGGGCGTCTCCCCCAGGAGGCTAGTGCTGAAGATCTTCGACAGTATTTCGGTAGATTTGGCCGGATTTTCGATGTATATGTCCCAAAGGATCCAAAGAGAACTGGTCATAGGGGATTTGGTTTTGTCACCTTTGCTGATGATGGTGTTGCAGATCGTGTGTCACGTAGATCTCATGAGATTTTTGGGCAACAGGTTGCAATTGATTCAGCCACGCCACTTGATGATGCTGGTCCAAGTAGTAGTTTTATGATGGATAACCCTGAACCTTATGGTGGTTATGGTGGTGGTCCTATGCGTCCTTACGGTAGAATGCATGGTGGGATGGAGTTTGATGATTGGGGCTATGGGATGGGCTCCGGGAGGCCATCCAGAGCAGATTTTAGGTATAGGCCTTATTAGACGTGGAGAGATACAATTGATGCCTTATCTAAGATTGACTTGTGAAAGACAATATCTTCTTTAGTCTCGTTATAAAGTCTATGGATGATGTATTTTGGTAGTGATACGTTTAATTTAGGGATACATACCAATATAATCCTATCTACTTGATTAAGTGTC

1. Polypyrimidine tract-binding protein homolog 2 (*PTBP2*)

GAGGGGACGCTTATAGGAGTATCAGGAAATAAATACCCATAAATTGTAATCCCTATCTCA

TCCCTCTGAACCCCGCAAACGACCTCAAGCATAGCATCTCGCCCACTCCACCGCCACCGCTCCGCCGCGCCAACCACCGGGCGTAAGCCGCCGCCTCCTCCTGAAACATCTCTCCACCGCATCAACTCAGCCAATCCGTCCGGTAGGATTTGTGGTGCGGAATGGCATCAGTATCCAGTCAGCCTCAGTTCCGCTACACGCAGCCACCGTCTAAGGTTCTGCACTTGAGAAACTTACCGTGGGAACGTACTGAGGAGGAACTTGTCGAATTAGGGAAGCCCTTCGGTAGAGTTGTCAATACCAAGTGTAATGTTGGAGCAAATCGTAACCAAGCATTTATAGAGTTTGCGGAATTGAATCAGGCAATCGCGATGATATCTTACTATGCTTCATCATCCGAACCAGCTCAGGTGCGAGGGAAAACTGTCTATCTACAGTATTCCAACAGGCAAGAAATAGTGAACAACAAAACTACTGCAGACGTAGCTGGGAATGTGCTTCTGGTAACCATTGAGGGTAATGACGCTCGACTCGTTAGCATTGATGTTCTTCACTTGGTATTTTCTGCTTTTGGATTTGTGCATAAGATCACTACATTTGAAAAGACAGCAGGATTTCAAGCTCTAGTCCAATTTTCAGATGCAGAGACTGCTTCTTCGGCAAAGGATGCTCTTGATGGAAGAAGCATTCCCAGGTATTTAATCCCTGAACTCGGACCTTGCACCCTCCGAATCACATATTCTGCGCACACAGATCTGAGCGTCAAGTTTCAGTCTCATCGTAGCAGGGACTATACTAATCCTCTCCTTCCAGTTGCTCCCTCCGCAATTGATGCTACTGGTCAGTTTAGTTTGGGCTTGGATGGGAAGAAATTGGAACCTGAGAGCAATGTACTTCTTGCTTCAATTGAGAACATGCAGTATGCAGTTACATTGGAAGTTCTGCACATGGTCTTTTCTTCTTTTGGACCTGTATTAAAGATTGCTATGTTTGATAAGAATGGTGGTGTTCAAGCGTTGATCCAGTATCCTGATATCCGGACTGCTGTTGCTGCGAAGGAAGCTTTGGAGGGACATTGCATATATGATGGTGGATTCTGCAAGCTTCACATCTCCTATTCTCGGCACACTGATCTCAGTATTAAGGTGAACAATGATCGTAGCAGAGACTATACAATCCCGAATTCACCTATGATGAACACTCAGCCATCCGTTCTAGGGCAGCAACCAACTCACCAATACAACGGGGCACAATACCCCCCAGAAAATCCCGCTGTACCTCAGCAGCCAGCAGCAGGCTGGAACTCAAACGTCCCAGCCGGACCTATGCAGCCGAATCACCATTACATGCCACCAGGAAATATTCCTCCTGAAATGGGCCATGGAATGATGCCGATGCACGGCCAGAGTGGTCAGCCACATTCTGCACCAATGCATCCGTATCATCAGCAATAGTGTATTGCTGGGAAGTTTTATTTGGGACATGCCTTGTGTTTTTTGCCTGAGGGGCTGAAATCGACTGGTAGAACAGAATCTTGGAGTGCCATTAGTACGTCTCTTGCATGGCGTATATTTTGGTAGCTGTTAAATTATGTTTTTTCTTGTTTTTACTTCATGTTGTTTACCAATGTTTCTAAAAGTTCAATAGTTGCGTGTAATGTACATTGATTAACCAGTTTGTGACACTGTAGCAAATGGTCAAGATATTCTGAAATCTGAATTTACTGCACTAAATAAGATAAATCCAAACATTTGGGCGTTGTGGCAG

1. Phosphoenolpyruvate carboxykinase (*PEPC*)

ACGCATTCAGTCAGGTGAGTTGGAGATAGAGAAAGCAATAGCATCTCGGAGGGGGGCGAGCGATCTAGGGTTTTGAGAAGGAGGAGTTGGCGAGAGTGAGCGATTTCATTTTGTTGAGAGTGTGAGAGGCCGGTTTTTGAGCGTTTTGTGCGGTTTCCGGAATCTCATTCCTTCCAAATGTCCGACAGAAAGCTTGTAGTCTTAGGTATCCCGTGGGATGTGGAAACCGAAGGTTTGAGGGAATACATGGCCAAGTTTGGGGATTTGGAGGACTGCGTTGTCATGAAGGAGAGGTCTACTGGACGATCTAGGGGATTCGGATATGTGACTTTTGCGACAGCTGGAGATGCAAAGGCAGCACTGTCAAGTGAGCATACACTTGGTAATAGAATACTGGAAGTCAAAATTGCCACTCCAAAGGAGGAAATGAGGTCATCATCCAAAAAAATCACCAGGATTTTTGTTGCACGGATTCCCCCATCTGTGTCTGAAGCAGCATTCCGAAGTTATTTTGAGAAATACGGGAACATTACCGATCTTTACATGCCCAAGGATCCAAGTACTAAAACACATCGTGGAATTGGGTTCGTCACTTTTGTTAATTCGGAATCTGTGGATGATCTAATGGCCGAGACCCATGAGTTGGGGGGCTCTACAATTGTTGTCGATCGAGCCACTCCCAAGGAGGATGAGATCAGGCCAGTAAGCCGAATGCCTCCAAGTGGTTATGGTGCATATAATTCTTACATGAATTCTGCAACCAGATATGCAGCATTAGGTGCTCCCACCTTATACGACCATCCTGGCTCTATGTATGGAGGAAGAAATGGCCCAGTAGCCCCTCCACGTGGTATGGGCAAAAAGATTTTTGTTGGGCGTCTCCCCCAGGAGGCTAGTGCTGAAGATCTTCGACAGTATTTCGGTAGATTTGGCCGGATTTTCGATGTATATGTCCCAAAGGATCCAAAGAGAACTGGTCATAGGGGATTTGGTTTTGTCACCTTTGCTGATGATGGTGTTGCAGATCGTGTGTCACGTAGATCTCATGAGATTTTTGGGCAACAGGTTGCAATTGATTCAGCCACGCCACTTGATGATGCTGGTCCAAGTAGTAGTTTTATGATGGATAACCCTGAACCTTATGGTGGTTATGGTGGTGGTCCTATGCGTCCTTACGGTAGAATGCATGGTGGGATGGAGTTTGATGATTGGGGCTATGGGATGGGCTCCGGGAGGCCATCCAGAGCAGATTTTAGGTATAGGCCTTATTAGACGTGGAGAGATACAATTGATGCCTTATCTAAGATTGACTTGTGAAAGACAATATCTTCTTTAGTCTCGTTATAAAGTCTATGGATGATGTATTTTGGTAGTGATACGTTTAATTTAGGGATACATACCAATATAATCCTATCTACTTGATTAAGTGTC
