# Supplementary material
Source: Research Square preprint supplement (doi:10.21203/rs.3.rs-9575819/v1)
Supplement: Supplementary file 2 [file dd764edd8db2954a60c1d658.xlsx]

## Sheet: Sheet1
Supplementary Table S2. Value of CT of all samples
Tissues	ACT7	EF-1	EIF	HIS3.3	hnRNP	PEPC	PP2A	PTBP2	RPL5	TBP	TUB8	UBQ
root	21.862	18.644	22.916	19.054	25.288	23.602	24.701	23.802	22.144	33.657	27.748	18.17
root	21.949	19.008	22.841	19.041	25.125	23.585	24.664	23.76	20.898	33.433	27.731	17.977
root	21.967	18.118	22.683	19.015	24.133	23.341	24.608	23.183	20.786	33.219	27.663	17.797
stem	23.707	19.924	25.023	18.904	24.083	21.938	24.564	22.939	19.943	32.599	27.601	17.451
stem	23.699	19.79	25.196	18.789	24.035	21.864	24.542	22.932	19.82	32.322	27.595	17.406
stem	23.748	19.856	25.044	18.628	24.001	23.832	24.478	22.932	19.728	32.263	27.295	17.309
leaf	20.747	18.916	23.051	19.777	25.451	23.832	26.288	24.286	22.35	35.046	29.712	18.992
leaf	20.825	18.744	23.279	19.745	25.399	23.676	26.191	24.156	22.295	34.777	29.527	18.887
leaf	20.967	18.859	23.272	19.736	25.377	23.62	26.115	24.067	22.23	34.268	29.446	18.875
SA treatment	ACT7	EF-1	EIF	HIS3.3	hnRNP	PEPC	PP2A	PTBP2	RPL5	TBP	TUB8	UBQ
SA-0h	26.398	20.77	25.447	21.067	25.375	22.426	26.545	25.009	23.124	25.965	29.816	19.698
SA-0h	26.467	20.893	25.433	21.097	25.352	22.477	26.56	25.117	23.111	25.887	30.57	19.665
SA-0h	26.116	20.949	25.478	21.052	25.24	22.467	27.11	25.114	23.141	25.876	30.035	19.826
SA-4h	29.7994	31.9694	30.0916	28.7536	31.6119	30.5968	29.6167	30.0561	29.2815	37.0353	29.9871	30.9767
SA-4h	29.7306	31.7785	30.0862	28.875	31.3376	30.6854	29.8635	29.8637	29.0526	34.4983	29.7463	30.9133
SA-4h	29.8242	31.8076	29.807	28.7098	30.947	30.4231	29.8373	29.9335	29.1606	37.2765	29.5465	30.9773
SA-8h	27.5546	29.9141	28.2459	26.271	29.2957	29.165	28.3387	28.5034	27.2264	33.9756	27.5873	29.1795
SA-8h	27.8347	29.9287	28.5498	26.9019	29.4983	29.1541	28.5012	28.5239	27.2888	33.9756	27.9222	29.1891
SA-8h	27.6348	30.1538	28.3863	26.8319	29.3886	29.3157	28.6458	28.4355	27.3182	33.9756	27.9723	29.0671
SA-12h	31.372	32.5366	31.5345	30.4971	31.973	32.2664	31.4242	31.6411	30.8909	36.9942	31.0072	32.087
SA-12h	31.2069	33.2842	31.4087	30.5675	32.3346	32.0309	31.8409	31.6273	30.8237	36.9942	31.0123	32.9769
SA-12h	31.2178	32.8326	31.3837	30.6175	32.5263	32.2372	31.3734	31.9238	30.7377	36.9942	31.0305	32.1467
MeJA treatment	ACT7	EF-1	EIF	HIS3.3	hnRNP	PEPC	PP2A	PTBP2	RPL5	TBP	TUB8	UBQ
MeJA-0h	26.398	20.77	25.447	21.067	25.375	22.426	26.545	25.009	23.124	25.965	29.816	19.698
MeJA-0h	26.467	20.893	25.433	21.097	25.352	22.477	26.56	25.117	23.111	25.887	30.57	19.665
MeJA-0h	26.116	20.949	25.478	21.052	25.24	22.467	27.11	25.114	23.141	25.876	30.035	19.826
MeJA-4h	22.8829	18.0188	21.6784	19.1153	23.2393	20.0193	23.9149	22.612	20.2356	22.0889	26.9168	17.7352
MeJA-4h	21.9898	18.0586	21.6572	19.0989	23.0463	19.9272	23.8958	22.7443	20.2498	22.1617	27.0036	17.7018
MeJA-4h	23.4454	18.1084	21.6927	19.0852	23.237	19.9532	23.8623	22.8791	20.2168	22.1632	26.9597	17.7158
MeJA-8h	21.9477	18.8349	22.697	19.3868	23.8624	20.3902	25.1624	23.2458	21.0363	22.982	27.9751	18.7646
MeJA-8h	22.2253	18.904	22.7686	19.4113	23.7861	20.3332	25.1666	23.4746	21.0748	22.9838	27.8565	18.7968
MeJA-8h	22.0544	18.8304	22.7902	19.493	23.8595	20.3703	25.228	23.2854	21.0691	23.0141	27.9472	18.8128
MeJA-12h	24.136	19.692	23.497	20.72	23.776	20.528	26.054	24.016	22.05	23.397	28.425	18.909
MeJA-12h	24.168	19.725	23.437	20.794	23.676	20.57	26.11	24.087	22.057	23.472	28.702	18.966
MeJA-12h	24.255	19.678	23.505	20.738	23.776	20.463	26.035	24.112	22.037	23.489	28.366	18.882
NaC1 treatment	ACT7	EF-1	EIF	HIS3.3	hnRNP	PEPC	PP2A	PTBP2	RPL5	TBP	TUB8	UBQ
NaC1-0h	26.398	20.77	25.447	21.067	25.375	22.426	26.545	25.009	23.124	25.965	29.816	19.698
NaC1-0h	26.467	20.893	25.433	21.097	25.352	22.477	26.56	25.117	23.111	25.887	30.57	19.665
NaC1-0h	26.116	20.949	25.478	21.052	25.24	22.467	27.11	25.114	23.141	25.876	30.035	19.826
NaC1-4h	24.6625	30.7642	23.4228	19.6744	25.7262	25.6547	25.3238	24.4934	26.9833	22.2611	27.0583	18.681
NaC1-4h	24.375	28.4447	23.4672	19.8185	25.7222	28.4794	25.6413	24.3222	26.6021	22.3182	27.2515	18.7195
NaC1-4h	24.927	34.4493	23.2915	19.7227	25.6126	29.7968	25.6417	24.4134	26.4125	22.2216	27.1644	18.7636
NaC1-8h	24.9138	33.678	23.8087	19.683	25.8633	20.4694	25.764	24.9633	27.0798	22.2742	28.2978	18.9088
NaC1-8h	24.9868	33.9528	23.9669	19.6074	25.7341	20.988	25.8459	25.0123	25.9803	22.0975	28.1414	18.9022
NaC1-8h	24.8052	32.7399	23.9722	19.6562	25.9564	21.6897	25.6813	24.9833	26.4879	22.327	28.1911	18.9353
NaC1-12h	24.8743	33.1544	23.7496	20.0452	26.2225	30.5303	25.9109	24.3196	23.939	21.8743	27.554	18.8537
NaC1-12h	24.9987	34.2631	24.1882	19.9771	25.9806	31.4014	26.1225	24.3242	23.7282	21.9008	27.5476	18.783
NaC1-12h	24.951	33.8597	24.0104	20.001	26.2961	31.4789	26.0045	24.3265	24.2425	22.5365	27.9036	18.7614
ABA treatment	ACT7	EF-1	EIF	HIS3.3	hnRNP	PEPC	PP2A	PTBP2	RPL5	TBP	TUB8	UBQ
ABA-0h	26.398	20.77	25.447	21.067	25.375	22.426	26.545	25.009	23.124	25.965	29.816	19.698
ABA-0h	26.467	20.893	25.433	21.097	25.352	22.477	26.56	25.117	23.111	25.887	30.57	19.665
ABA-0h	26.116	20.949	25.478	21.052	25.24	22.467	27.11	25.114	23.141	25.876	30.035	19.826
ABA-4h	20.6934	19.315	22.7667	19.8295	23.811	20.4364	25.1032	23.1114	21.783	22.7913	26.5499	17.702
ABA-4h	20.5498	19.2831	22.8191	19.9361	23.8432	20.4269	25.2754	23.0751	21.654	22.7708	26.7327	17.7056
ABA-4h	20.7098	19.3544	22.8591	19.9582	23.8912	20.3001	25.1382	23.2113	21.6466	22.8741	26.6125	17.7353
ABA-8h	20.9273	20.2598	25.6054	20.8426	24.2816	23.1966	27.0904	23.9052	21.3294	22.9853	27.0264	18.2698
ABA-8h	20.9746	20.288	25.5851	20.9615	24.3058	23.3092	27.089	23.9251	21.3045	23.0172	27.3324	18.4338
ABA-8h	21.0365	20.2097	25.6444	20.99	24.2762	23.2093	27.0487	23.831	21.2997	22.9563	27.3424	18.4209
ABA-12h	21.3342	19.3453	23.2888	19.9058	24.0488	20.9718	25.1908	23.5201	21.79	22.9555	27.7117	18.1374
ABA-12h	21.2949	19.2609	23.2314	19.9599	24.1752	20.9825	25.1967	23.5113	21.7998	22.9566	27.6217	18.2629
ABA-12h	21.3213	19.2915	23.1326	19.9566	24.1716	20.9843	25.1678	23.5354	21.7694	22.9822	27.8727	18.2457
Dehy treatment	ACT7	EF-1	EIF	HIS3.3	hnRNP	PEPC	PP2A	PTBP2	RPL5	TBP	TUB8	UBQ
Dehy-0h	26.398	20.77	25.447	21.067	25.375	22.426	26.545	25.009	23.124	25.965	29.816	19.698
Dehy-0h	26.467	20.893	25.433	21.097	25.352	22.477	26.56	25.117	23.111	25.887	30.57	19.665
Dehy-0h	26.116	20.949	25.478	21.052	25.24	22.467	27.11	25.114	23.141	25.876	30.035	19.826
Dehy-2h	22.234	20.881	23.867	20.237	25.978	21.842	26.094	24.358	22.337	23.571	27.876	17.676
Dehy-2h	22.285	20.909	23.901	20.249	26.062	21.801	26.089	24.443	22.281	23.652	27.762	17.739
Dehy-2h	22.193	20.908	23.953	20.342	26.053	21.85	26.195	24.435	22.372	23.764	27.899	17.777
Dehy-4h	25.052	25.589	27.111	24.083	28.157	26.169	28.2	26.899	25.391	28.721	27.342	20.489
Dehy-4h	24.938	25.596	27.16	24.109	28.219	26.185	28.228	26.998	25.244	28.601	27.351	20.505
Dehy-4h	24.983	25.533	27.03	23.99	28.278	26.055	28.084	26.944	25.349	28.219	27.241	20.5
Dehy-8h	23.757	21.168	25.697	22.054	27.819	23.363	27.761	25.939	23.277	25.976	28.444	18.84
Dehy-8h	23.725	21.631	25.911	22.077	27.987	23.307	27.836	25.947	23.398	25.956	28.352	18.802
Dehy-8h	23.68	21.58	25.906	22.032	27.84	23.46	27.848	25.917	23.38	25.877	28.348	18.78
